# Supplementary material for: Development of an Advanced-Generation Multi-Objective Breeding Population for the 4th Cycle of Chinese Fir (Cunninghamia lanceolata (Lamb.) Hook.)
Source: MDPI journal article supplement (doi:10.3390/f14081658), 2023-08-16
Supplement: s1 [file s1]

## Supplementary Materials

**Table S1.** 233 individuals of Chinese fir from generation 1 to generation 4 used in this trial.

| Classification | Source and germplasm number                                                                                                                                                                                                                                                                                                                                                                                                                                                                                                                                                                                                                                                        | Quantity |
|----------------|------------------------------------------------------------------------------------------------------------------------------------------------------------------------------------------------------------------------------------------------------------------------------------------------------------------------------------------------------------------------------------------------------------------------------------------------------------------------------------------------------------------------------------------------------------------------------------------------------------------------------------------------------------------------------------|----------|
| G1             | F12、E139                                                                                                                                                                                                                                                                                                                                                                                                                                                                                                                                                                                                                                                                           | 2        |
| G2             | E154、E149、E153、E157、F13、E156、E147、E71、E69、E136、<br>E50、E103、E150、E72、E90、A3、B9、C7、C11、E35、<br>E9、E10、C5、C4、E44、B11、E158、E159、F7、E49、<br>E152、E148、E110、E137、E130、A6、E16、E25、A1、A5、<br>E43、E23、E11、E151、E155、E7、E67、E111、E56、C2、<br>E119、E17、E73、E105、E66、E124                                                                                                                                                                                                                                                                                                                                                                                                                      | 56       |
| G3             | B3、E14、E126、E40、E112、E95、E143、E18、E113、E86、<br>E134、C20、E97、E146、E127、C30、C23、E1、C34、E85、<br>E98、E141、E70、C36、E54、E94、E89、C31、E82、E145、<br>E51、E65、E38、E5、E78、E129、C33、E99、B10、E81、<br>B13、B8、C25、E68、E125、C27、C12、E93、E47、E102、<br>C15、E132、C37、C9、A2、E34、E42、C32、E114、F5、<br>E26、E88、F2、E74、F15、E41、E64、E133、E28、E122、<br>E21、E20、E13、E22、A7、E118、E96、E75、E108、E135、<br>E63、E6、E104、C3、E52、E117、E48、C19、E91、F9、<br>E12、F14、E55、E59、C18、E27、E62、E57、B12、E8、<br>C10、E79、C14、E24、C16、F3、E19、E15、C13、E83、<br>C26、E115、E101、E107、C21、C35、C22、C29、C38、E123、<br>E121、E116、E109、E87、C28、C8、C24、C6、F10、F11、<br>E140、E106、E84、E100、A4、E131、E76、E4、E142、E80、<br>E138、E77、E120、E92、E128、E144 | 146      |
| G4             | E46、F4、E37、C1、F1、B2、E39、B1、F8、E58、<br>E53、E33、B5、B6、B4、C17、E36、B7、E29、E30、<br>F6、E31、E32、F16、E60、E45、E2、E3、E6                                                                                                                                                                                                                                                                                                                                                                                                                                                                                                                                                                      | 29       |
| Total          | The 4 <sup>th</sup> cycle of Chinese fir breeding population                                                                                                                                                                                                                                                                                                                                                                                                                                                                                                                                                                                                                       | 233      |

Note: G1~G4 represent the 1st, 2nd, 3rd and 4th generation breeding parents, respectively.

**Table S2.** Basic information of 31 progeny trials from breeding cycles two and three.

| <b>Trial</b> | <b>Planting year</b> | <b>Cycle</b> | <b>Cross type</b> | <b>No of families</b> | <b>Location</b> | <b>Latitude and longitude</b> | <b>Experimental design</b>  | <b>Plot tree</b> | <b>Repetition</b> |
|--------------|----------------------|--------------|-------------------|-----------------------|-----------------|-------------------------------|-----------------------------|------------------|-------------------|
| 1            | 1988                 | 2            | OP                | 127                   | Yangkou         | 26°49'N, 117°53'E             | Randomized incomplete block | 4                | 10                |
| 2            | 1988                 | 2            | OP                | 127                   | Guanzhuang      | 26°32'N, 117°45'E             | Randomized incomplete block | 4                | 10                |
| 3            | 1989                 | 2            | OP                | 238                   | Yangkou         | 26°49'N, 117°53'E             | Randomized complete block   | 4                | 10                |
| 4            | 1989                 | 2            | OP                | 238                   | Guanzhuang      | 26°32'N, 117°45'E             | Randomized complete block   | 4                | 10                |
| 5            | 1990                 | 2            | OP                | 41                    | Yangkou         | 26°49'N, 117°53'E             | Randomized incomplete block | 10               | 3                 |
| 6            | 1990                 | 2            | OP                | 41                    | Guanzhuang      | 26°32'N, 117°45'E             | Randomized incomplete block | 10               | 3                 |
| 7            | 1991                 | 2            | OP                | 237                   | Yangkou         | 26°49'N, 117°53'E             | Randomized incomplete block | 4                | 10                |
| 8            | 1991                 | 2            | OP                | 237                   | Guanzhuang      | 26°32'N, 117°45'E             | Randomized incomplete block | 4                | 10                |
| 9            | 1992                 | 2            | OP                | 207                   | Yangkou         | 26°49'N, 117°53'E             | Randomized complete block   | 4                | 12                |
| 10           | 1992                 | 2            | OP                | 207                   | Guanzhuang      | 26°32'N, 117°45'E             | Randomized complete block   | 4                | 12                |
| 11           | 1994                 | 2            | OP                | 44                    | Yangkou         | 26°49'N, 117°53'E             | Randomized complete block   | 4                | 10                |
| 12           | 1994                 | 2            | OP                | 44                    | Guanzhuang      | 26°32'N, 117°45'E             | Randomized complete block   | 4                | 10                |
| 13           | 2003                 | 2            | OP                | 81                    | Weimin          | 27°05'N, 117°40'E             | Randomized complete block   | 4                | 10                |
| 14           | 2003                 | 2            | OP                | 81                    | Guanzhuang      | 26°32'N, 117°45'E             | Randomized complete block   | 4                | 10                |
| 15           | 2003                 | 2            | OP                | 81                    | Xikou           | 25°36'N, 118°69'E             | Randomized complete block   | 4                | 10                |
| 16           | 2003                 | 2            | OP                | 81                    | Yangkou         | 26°49'N, 117°53'E             | Randomized complete block   | 4                | 10                |
| 17           | 2005                 | 2            | OP                | 79                    | Guanzhuang      | 26°32'N, 117°45'E             | Randomized complete block   | 4                | 10                |
| 18           | 2005                 | 2            | OP                | 79                    | Yangkou         | 26°49'N, 117°53'E             | Randomized complete block   | 4                | 10                |
| 19           | 2008                 | 3            | OP                | 102                   | Guanzhuang      | 26°32'N, 117°45'E             | Randomized complete block   | 4                | 10                |
| 20           | 2008                 | 3            | OP                | 102                   | Weimin          | 27°05'N, 117°40'E             | Randomized complete block   | 4                | 10                |
| 21           | 2008                 | 3            | OP                | 102                   | Youxi           | 26°10'N, 118°11'E             | Randomized complete block   | 4                | 10                |
| 22           | 2008                 | 3            | OP                | 92                    | Yangkou         | 26°49'N, 117°53'E             | Randomized complete block   | 4                | 10                |

| <b>Trial</b> | <b>Planting year</b> | <b>Cycle</b> | <b>Cross type</b> | <b>No of families</b> | <b>Location</b> | <b>Latitude and longitude</b> | <b>Experimental design</b> | <b>Plot tree</b> | <b>Repetition</b> |
|--------------|----------------------|--------------|-------------------|-----------------------|-----------------|-------------------------------|----------------------------|------------------|-------------------|
| 23           | 2008                 | 3            | OP                | 92                    | Guanzhuang      | 26°32'N, 117°45'E             | Randomized complete block  | 4                | 10                |
| 24           | 2008                 | 3            | OP                | 92                    | Jiangle         | 26°43'N, 117°28'E             | Randomized complete block  | 4                | 10                |
| 25           | 2010                 | 3            | OP                | 168                   | Yangkou         | 26°49'N, 117°53'E             | Randomized complete block  | 4                | 10                |
| 26           | 2010                 | 3            | OP                | 168                   | Guanzhuang      | 26°32'N, 117°45'E             | Randomized complete block  | 4                | 10                |
| 27           | 2010                 | 3            | OP                | 168                   | Weimin          | 27°05'N, 117°40'E             | Randomized complete block  | 4                | 10                |
| 28           | 2011                 | 3            | OP                | 112                   | Yangkou         | 26°49'N, 117°53'E             | Randomized complete block  | 5                | 10                |
| 29           | 2011                 | 3            | OP                | 112                   | Guanzhuang      | 26°32'N, 117°45'E             | Randomized complete block  | 5                | 10                |
| 30           | 2011                 | 3            | OP                | 112                   | Jiangle         | 26°43'N, 117°28'E             | Randomized complete block  | 5                | 10                |
| 31           | 2011                 | 3            | CP                | 112                   | Youxi           | 26°10'N, 118°11'E             | Randomized complete block  | 5                | 10                |

Note: Yangkou, Guanzhuang, Weimin, Xikou, Jiangle, Youxi are State-owned Forest Farm of Fujian Province

CP: control-pollinated

OP: open-pollinated

**Table S3.** T-test results of core subpopulation.

| Core Collection | Phenotype | T-value | F-value |
|-----------------|-----------|---------|---------|
| <b>S-60%</b>    | HGW       | -1.114  | 0.266   |
|                 | DBH       | 2.408   | 0.17    |
|                 | WBD       | -1.243  | 0.215   |
| <b>MP1-70%</b>  | HGW       | 14.554  | 0       |
|                 | DBH       | -1.079  | 0.282   |
|                 | WBD       | -1.497  | 0.136   |
| <b>MP2-60%</b>  | HGW       | -1.609  | 0.109   |
|                 | DBH       | 18.922  | 0       |
|                 | WBD       | 4.933   | 0       |
| <b>MP3-70%</b>  | HGW       | -1.652  | 0.1     |
|                 | DBH       | 15.761  | 0       |
|                 | WBD       | 3.104   | 0.004   |
| <b>CP</b>       | HGW       | 1.89    | 0.04    |
|                 | DBH       | 5.734   | 0       |
|                 | WBD       | 2.658   | 0.008   |

Note: CP, core population

**Table S4.** Pearson correlations between HGW, DBH and WBD

| Trait | HGW     | DBH     | WBD   |
|-------|---------|---------|-------|
| HGW   |         | 0.162   | 0.039 |
| DBH   | -0.092  |         | 0.000 |
| WBD   | -0.135* | 0.328** |       |

Note: The diagonal below represents Pearson correlation, and the diagonal above represents the P-value. \* represents  $P < 0.05$ . \*\* represents  $P < 0.01$ .

**Table S5.** Genetic gain of phenotypic traits of various quality resources in the core population.

| ID   | HGW/g | DBH/cm | WD/(kg/m3) | $\Delta G$<br>HGW | $\Delta G$<br>DBH | $\Delta G$<br>WBD | Population |
|------|-------|--------|------------|-------------------|-------------------|-------------------|------------|
| B13  | 1.088 | 21.8   | 337.3      | 91.20%            | -6.45%            | 3.19%             | MP1        |
| C22  | 0.748 | 28.5   | 348.2      | 31.45%            | 22.30%            | 6.52%             | MP1        |
| C25  | 0.57  | 24.4   | 317.8      | 0.17%             | 4.70%             | -2.78%            | MP2        |
| C28  | 0.879 | 24.4   | 304.8      | 54.47%            | 4.70%             | -6.76%            | MP1        |
| C29  | 0.512 | 23.3   | 345.2      | -10.02%           | -0.02%            | 5.60%             | MP3        |
| C30  | 0.682 | 25.7   | 375.17     | 19.85%            | 10.28%            | 14.77%            | MP3        |
| E100 | 0.598 | 22.4   | 329.2      | 5.09%             | -3.88%            | 0.71%             | MP1        |
| E105 | 0.64  | 29.3   | 335.45     | 12.47%            | 25.73%            | 2.62%             | MP1        |
| E106 | 0.639 | 28.3   | 318.31     | 12.29%            | 21.44%            | -2.62%            | MP1        |
| E110 | 0.604 | 26.9   | 361.49     | 6.14%             | 15.43%            | 10.59%            | MP3        |
| E111 | 0.593 | 27.6   | 354.2      | 4.21%             | 18.44%            | 8.36%             | MP3        |
| E114 | 0.789 | 25.1   | 373.63     | 38.65%            | 7.71%             | 14.30%            | MP1        |
| E118 | 0.666 | 27.8   | 309.02     | 17.04%            | 19.29%            | -5.47%            | MP1        |
| E121 | 0.649 | 24.2   | 311.18     | 14.05%            | 3.85%             | -4.81%            | MP1        |
| E123 | 0.583 | 32.2   | 358.25     | 2.45%             | 38.18%            | 9.59%             | MP2        |
| E124 | 0.576 | 27.2   | 308.63     | 1.22%             | 16.72%            | -5.58%            | MP2        |
| E126 | 0.627 | 27.5   | 304.15     | 10.19%            | 18.01%            | -6.96%            | MP1        |
| E129 | 0.501 | 28     | 318.14     | -11.96%           | 20.15%            | -2.68%            | MP2        |
| E131 | 0.666 | 25.3   | 374.94     | 17.04%            | 8.57%             | 14.70%            | MP3        |
| E136 | 0.502 | 23.1   | 358.25     | -11.78%           | -0.87%            | 9.59%             | MP3        |
| E141 | 0.699 | 22.3   | 328.4      | 22.84%            | -4.31%            | 0.46%             | MP1        |
| E143 | 0.52  | 22.1   | 305.6      | -8.62%            | -5.17%            | -6.51%            | MP2        |
| E144 | 0.677 | 25.3   | 332.5      | 18.97%            | 8.57%             | 1.72%             | MP1        |
| E147 | 0.748 | 34.3   | 349.94     | 31.45%            | 47.19%            | 7.05%             | MP1        |
| E149 | 0.592 | 34.6   | 323.71     | 4.04%             | 48.47%            | -0.97%            | MP2        |
| E150 | 0.486 | 33.2   | 371.71     | -14.59%           | 42.47%            | 13.71%            | MP3        |
| E151 | 0.645 | 32.7   | 451.39     | 13.35%            | 40.32%            | 38.09%            | MP3        |
| E152 | 0.718 | 36.4   | 367.42     | 26.18%            | 56.20%            | 12.40%            | MP2        |
| E153 | 0.511 | 35.4   | 437.82     | -10.20%           | 51.91%            | 33.94%            | MP3        |
| E154 | 0.507 | 37.4   | 404.15     | -10.90%           | 60.49%            | 23.64%            | MP3        |
| E155 | 0.587 | 34.1   | 322.1      | 3.16%             | 46.33%            | -1.46%            | MP2        |
| E156 | 0.599 | 43.5   | 309.65     | 5.27%             | 86.67%            | -5.27%            | MP2        |
| E157 | 0.518 | 29.7   | 387.27     | -8.97%            | 27.45%            | 18.47%            | MP3        |
| E158 | 0.698 | 44.3   | 415.19     | 22.66%            | 90.10%            | 27.01%            | MP2        |
| E25  | 0.583 | 25.4   | 314.73     | 2.45%             | 9.00%             | -3.72%            | MP1        |
| E31  | 0.484 | 22.8   | 314.03     | -14.94%           | -2.16%            | -3.93%            | MP2        |
| E39  | 0.71  | 23.8   | 342.62     | 24.77%            | 2.13%             | 4.81%             | MP1        |
| E42  | 0.509 | 21.6   | 307.62     | -10.55%           | -7.31%            | -5.89%            | MP3        |

|            |       |      |        |         |        |        |     |
|------------|-------|------|--------|---------|--------|--------|-----|
| <b>E44</b> | 0.565 | 23.9 | 307.25 | -0.71%  | 2.56%  | -6.01% | MP2 |
| <b>E60</b> | 0.696 | 21.4 | 342.53 | 22.31%  | -8.17% | 4.79%  | MP1 |
| <b>E66</b> | 0.512 | 30.4 | 340    | -10.02% | 30.45% | 4.01%  | MP3 |
| <b>E67</b> | 0.499 | 30.2 | 326.5  | -12.31% | 29.59% | -0.12% | MP2 |
| <b>E68</b> | 0.499 | 28.6 | 361.5  | -12.31% | 22.73% | 10.59% | MP3 |
| <b>E76</b> | 0.521 | 24.5 | 385.9  | -8.44%  | 5.13%  | 18.05% | MP3 |
| <b>E79</b> | 0.558 | 27.1 | 309.9  | -1.94%  | 16.29% | -5.20% | MP2 |
| <b>E83</b> | 0.649 | 23.6 | 308.7  | 14.05%  | 1.27%  | -5.56% | MP1 |
| <b>E87</b> | 0.537 | 25.5 | 369.5  | -5.63%  | 9.42%  | 13.04% | MP3 |
| <b>E92</b> | 0.526 | 26.1 | 321.7  | -7.56%  | 12.00% | -1.59% | MP2 |
| <b>E93</b> | 0.503 | 25.4 | 344.3  | -11.61% | 9.00%  | 5.33%  | MP3 |
| <b>E98</b> | 0.614 | 30.5 | 337.6  | 7.90%   | 30.88% | 3.28%  | MP2 |

**Table S6.** Pedigree relationship 233 individuals.

| <b>Relationship</b> | <b>The number of relationship pairs</b> |
|---------------------|-----------------------------------------|
| 0.5                 | 32                                      |
| 0.25                | 245                                     |
| 0.125               | 98                                      |
| 0.0625              | 1156                                    |
| 0.03125             | 557                                     |
| 0.015625            | 43                                      |
| 0                   | 27028                                   |

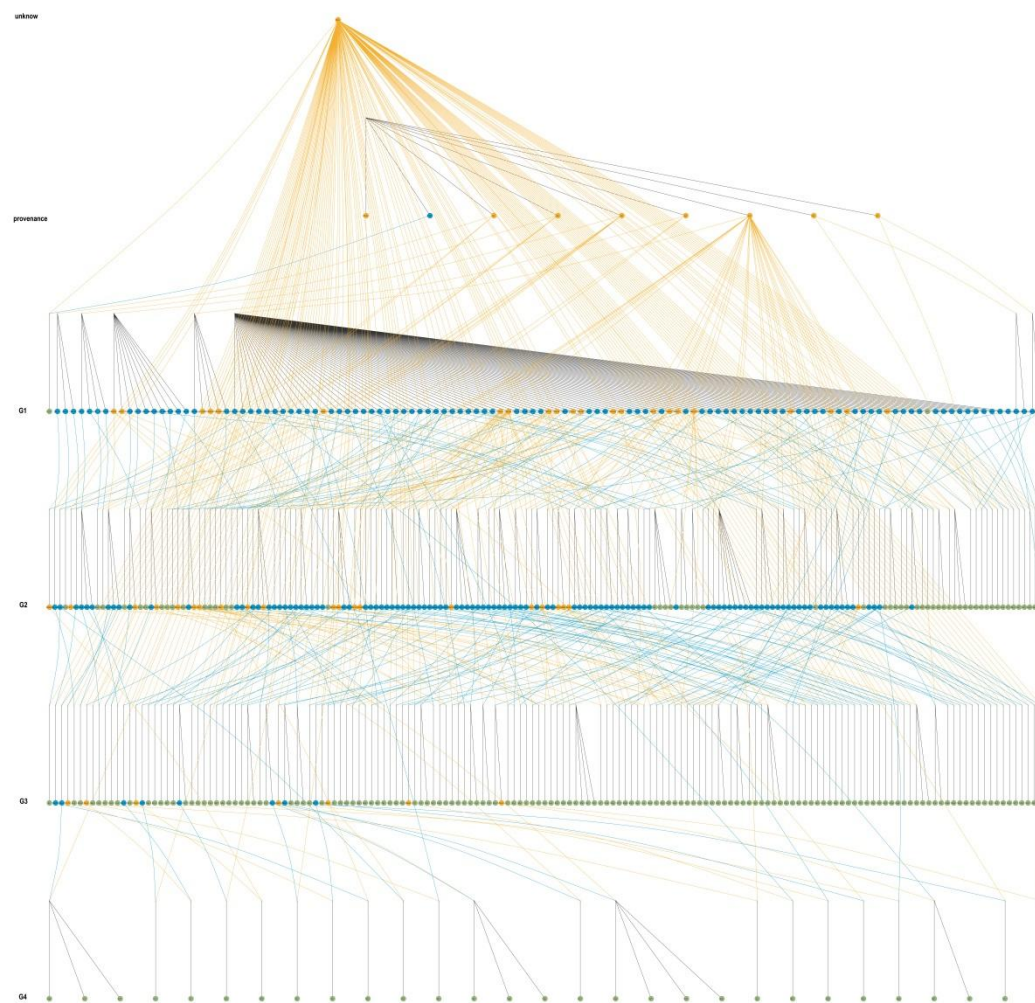

**Figure S1.** Pedigree analysis of 233 individuals.

Note: Three colored dots were used: blue for male, yellow for female, and green for gender unknown. The green dots represent the 233 individuals in the study. The top is the ancestor individual and the bottom is the descendant individual. Parents and offspring are connected through a point, and the line between the offspring and the middle node is dark gray. The middle node connects the lines of the male and the female, which are the same color as the parent.

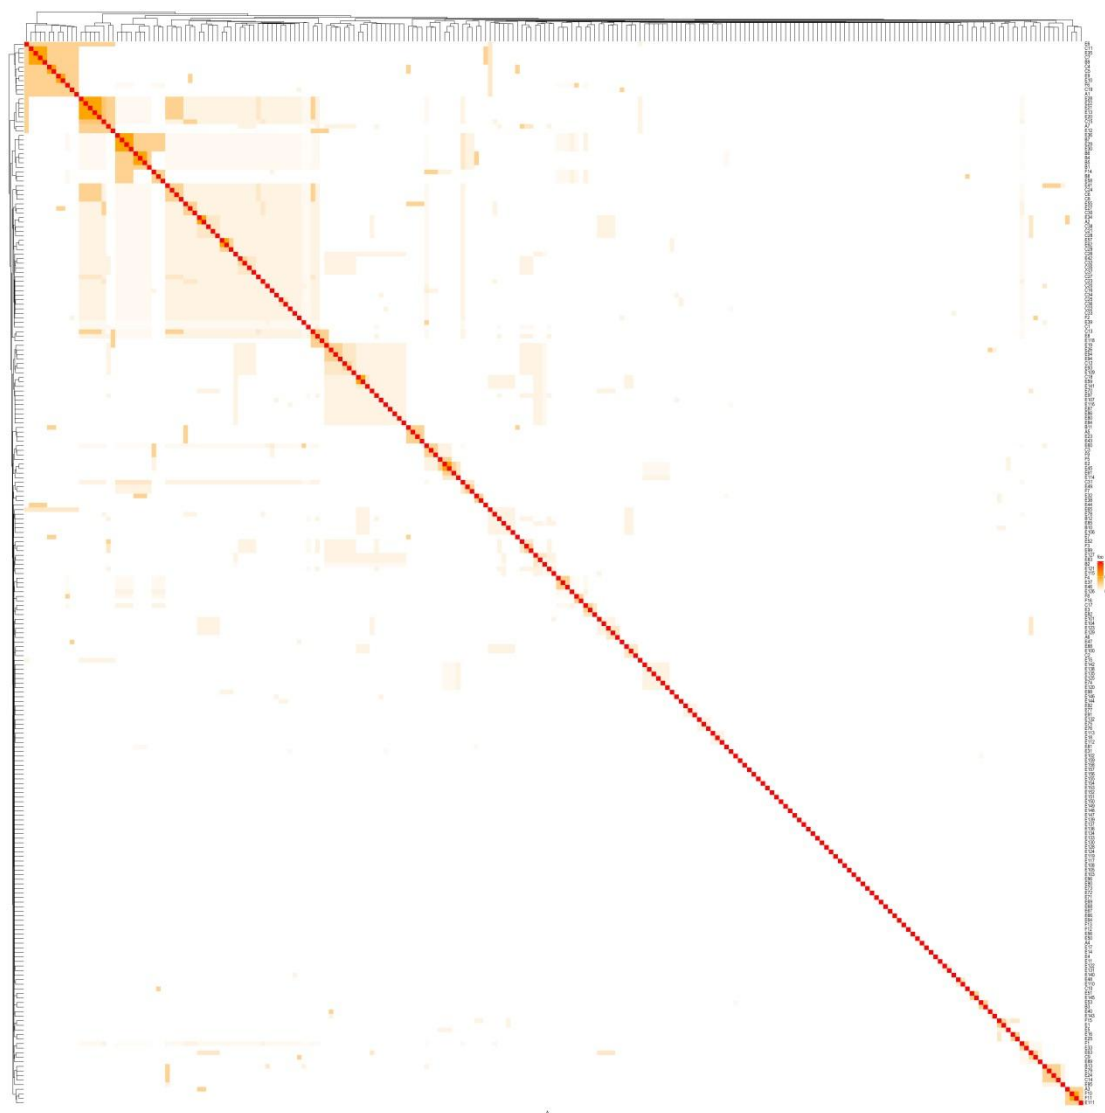

**Figure S2.** Kinship based on pedigree of the 233 individuals.



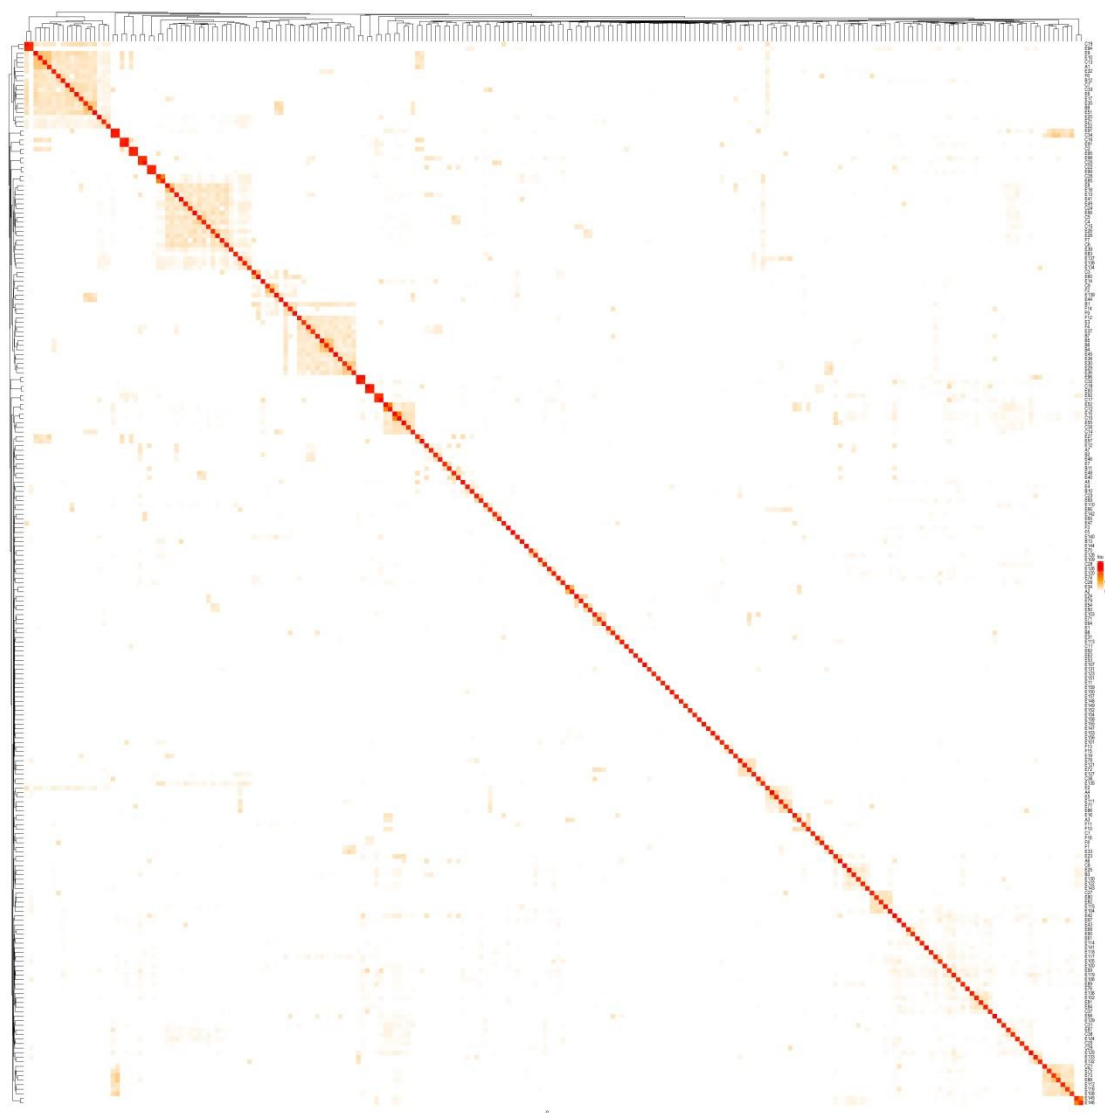

**Figure S3.** Kinship based on molecular of the 233 individuals.



**Figure S4.** Pedigree analysis of 50 individuals.

Note: Three colored dots were used: blue for male, yellow for female, and green for gender unknown. The green dots represent the 50 individuals in the study. The top is the ancestor and the bottom is the descendant individual. Parents and offspring are connected through a point, and the line between the offspring and the middle node is dark gray. The middle node connects the lines of the male and the female, which are the same color as the parent.
